# Supplementary material for: Sexual behaviour patterns and STI risk: results of a cluster analysis among men who have sex with men in Portugal
Source: HighWire-hosted journal article supplement (doi:10.1136/bmjopen-2019-033290), 2021-01-01
Supplement: bmjopen-2019-033290supp001_data_supplement.pdf [file bmjopen-2019-033290supp001_data_supplement.pdf]

**Supplementary material 1. SPSS Syntax file used for the cluster analysis**

```
CLUSTER  
Age_REC_5cat_2  
SexMen_number_REC_4cat  
MCLUB  
REC_CondomLast_Male  
SubsSex_Alc  
SubsSex_Pop  
/METHOD BAVERAGE  
/MEASURE=SEUCLID  
/PRINT SCHEDULE CLUSTER(4,9)  
/PRINT DISTANCE  
/PLOT VICICLE  
/SAVE CLUSTER(4,9).
```
