# Supplementary material for: Sexual behaviour patterns and STI risk: results of a cluster analysis among men who have sex with men in Portugal
Source: HighWire-hosted journal article supplement (doi:10.1136/bmjopen-2019-033290), 2021-01-01
Supplement: bmjopen-2019-033290supp002_data_supplement.pdf [file bmjopen-2019-033290supp002_data_supplement.pdf]

Tab. 1b Adjusted Odds Ratios from a multivariable logistic regression for self-reported current STI (diagnosed positive)

| Current STI                                                                  | Odds Ratio  | p-value | 95% CI |       |
|------------------------------------------------------------------------------|-------------|---------|--------|-------|
| <b>Age group</b>                                                             |             |         |        |       |
| 18-20                                                                        | ref.        |         |        |       |
| 21-30                                                                        | 0.39        | 0.192   | 0.10   | 1.60  |
| 31-40                                                                        | 0.89        | 0.866   | 0.24   | 3.37  |
| 41-50                                                                        | <b>3.73</b> | 0.052   | 0.99   | 14.05 |
| >50                                                                          | 1.18        | 0.862   | 0.18   | 7.78  |
| <b>Number of sexual male partners in the last 12 months</b>                  |             |         |        |       |
| 1                                                                            | ref.        |         |        |       |
| 2-4                                                                          | 0.59        | 0.399   | 0.18   | 2.00  |
| 5-12                                                                         | 2.26        | 0.126   | 0.80   | 6.41  |
| >12                                                                          | 1.79        | 0.297   | 0.60   | 5.38  |
| <b>Frequency of visiting gay clubs, bars, discos to meet sexual partners</b> |             |         |        |       |
| Many times                                                                   | ref.        |         |        |       |
| Sometimes                                                                    | 3.13        | 0.150   | 0.66   | 14.79 |
| Rarely                                                                       | <b>4.38</b> | 0.062   | 0.93   | 20.72 |
| Doesn't visit                                                                | <b>6.06</b> | 0.030   | 1.20   | 30.76 |
| <b>Condom use in last sex intercourse</b>                                    |             |         |        |       |
| No                                                                           | ref.        |         |        |       |
| Yes                                                                          | 1.72        | 0.260   | 0.67   | 4.44  |
| <b>Popper use before or during last sex intercourse</b>                      |             |         |        |       |
| No                                                                           | ref.        |         |        |       |
| Yes                                                                          | <b>2.45</b> | 0.081   | 0.89   | 6.71  |
| <b>Alcohol use before or during last sex intercourse</b>                     |             |         |        |       |
| No                                                                           | ref.        |         |        |       |
| Yes                                                                          | 0.98        | 0.955   | 0.44   | 2.15  |

Tab. 2b Adjusted Odds Ratios from a multivariable MIXED EFFECT logistic regression for self-reported current STI (diagnosed positive) with age group as a random effect

| <b>Current STI</b>                                                           | <b>Odds Ratio</b> | <b>p-value</b> | <b>95% CI</b> |       |
|------------------------------------------------------------------------------|-------------------|----------------|---------------|-------|
| <b>FIXED EFFECT</b>                                                          |                   |                |               |       |
| <b>Number of sexual male partners in the last 12 months</b>                  |                   |                |               |       |
| 1                                                                            | ref.              |                |               |       |
| 2-4                                                                          | 0.59              | 0.391          | 0.18          | 1.97  |
| 5-12                                                                         | 2.25              | 0.125          | 0.80          | 6.36  |
| >12                                                                          | 1.85              | 0.269          | 0.62          | 5.52  |
| <b>Frequency of visiting gay clubs, bars, discos to meet sexual partners</b> |                   |                |               |       |
| Many times                                                                   | ref.              |                |               |       |
| Sometimes                                                                    | 3.05              | 0.158          | 0.65          | 14.29 |
| Rarely                                                                       | <b>4.25</b>       | 0.066          | 0.91          | 19.92 |
| Doesn't visit                                                                | <b>6.05</b>       | 0.029          | 1.20          | 30.39 |
| <b>Condom use in last sex intercourse</b>                                    |                   |                |               |       |
| No                                                                           | ref.              |                |               |       |
| Yes                                                                          | 1.70              | 0.270          | 0.66          | 4.37  |
| <b>Popper use before or during last sex intercourse</b>                      |                   |                |               |       |
| No                                                                           | ref.              |                |               |       |
| Yes                                                                          | 2.32              | 0.100          | 0.85          | 6.30  |
| <b>Alcohol use before or during last sex intercourse</b>                     |                   |                |               |       |
| No                                                                           | ref.              |                |               |       |
| Yes                                                                          | 0.97              | 0.936          | 0.44          | 2.12  |
| <b>RANDOM EFFECT</b>                                                         |                   |                |               |       |
| <b>AGE GROUP (var)</b>                                                       | <b>0.50</b>       |                | 0.10          | 2.43  |

Tab. 3b Adjusted Odds Ratios from a multivariable MIXED EFFECT logistic regression for self-reported current STI (diagnosed positive) with number of sexual male partners in the last 12 months as a random effect

| Current STI                                                                  | Odds Ratio  | p-value | 95% CI |       |
|------------------------------------------------------------------------------|-------------|---------|--------|-------|
| <b>FIXED EFFECT</b>                                                          |             |         |        |       |
| <b>Age group</b>                                                             |             |         |        |       |
| 18-20                                                                        | ref.        |         |        |       |
| 21-30                                                                        | 0.39        | 0.185   | 0.10   | 1.57  |
| 31-40                                                                        | 0.93        | 0.909   | 0.25   | 3.45  |
| 41-50                                                                        | <b>3.83</b> | 0.045   | 1.03   | 14.18 |
| >50                                                                          | 1.18        | 0.864   | 0.18   | 7.63  |
| <b>Frequency of visiting gay clubs, bars, discos to meet sexual partners</b> |             |         |        |       |
| Many times                                                                   | ref.        |         |        |       |
| Sometimes                                                                    | 3.00        | 0.165   | 0.64   | 14.16 |
| Rarely                                                                       | <b>3.84</b> | 0.090   | 0.81   | 18.27 |
| Doesn't visit                                                                | <b>4.78</b> | 0.060   | 0.94   | 24.35 |
| <b>Condom use in last sex intercourse</b>                                    |             |         |        |       |
| No                                                                           | ref.        |         |        |       |
| Yes                                                                          | 1.90        | 0.177   | 0.75   | 4.83  |
| <b>Popper use before or during last sex intercourse</b>                      |             |         |        |       |
| No                                                                           | ref.        |         |        |       |
| Yes                                                                          | <b>2.62</b> | 0.057   | 0.97   | 7.06  |
| <b>Alcohol use before or during last sex intercourse</b>                     |             |         |        |       |
| No                                                                           | ref.        |         |        |       |
| Yes                                                                          | 0.97        | 0.946   | 0.44   | 2.13  |
| <b>RANDOM EFFECT</b>                                                         |             |         |        |       |
| <b>Number of sexual male partners in the last 12 months (var)</b>            | <b>0.10</b> |         | 0.00   | 2.90  |
