# Supplementary material for: Sexual behaviour patterns and STI risk: results of a cluster analysis among men who have sex with men in Portugal
Source: HighWire-hosted journal article supplement (doi:10.1136/bmjopen-2019-033290), 2021-01-01
Supplement: bmjopen-2019-033290supp003_data_supplement.pdf [file bmjopen-2019-033290supp003_data_supplement.pdf]

Tab. 1a Adjusted Odds Ratios from a multivariable logistic regression for self-reported previous STI (diagnosed positive)

| Previous STI                                                                 | Odds Ratio  | p-value | 95% CI |       |
|------------------------------------------------------------------------------|-------------|---------|--------|-------|
| <b>Age group</b>                                                             |             |         |        |       |
| 18-20                                                                        | ref.        |         |        |       |
| 21-30                                                                        | 1.55        | 0.313   | 0.66   | 3.61  |
| 31-40                                                                        | <b>2.59</b> | 0.029   | 1.10   | 6.07  |
| 41-50                                                                        | <b>2.96</b> | 0.023   | 1.16   | 7.54  |
| >50                                                                          | <b>4.74</b> | 0.006   | 1.56   | 14.48 |
| <b>Number of sexual male partners in the last 12 months</b>                  |             |         |        |       |
| 1                                                                            | ref.        |         |        |       |
| 2-4                                                                          | 0.72        | 0.289   | 0.40   | 1.32  |
| 5-12                                                                         | <b>1.66</b> | 0.091   | 0.92   | 3.00  |
| >12                                                                          | <b>2.60</b> | 0.002   | 1.42   | 4.73  |
| <b>Frequency of visiting gay clubs, bars, discos to meet sexual partners</b> |             |         |        |       |
| Many times                                                                   | ref.        |         |        |       |
| Sometimes                                                                    | 1.09        | 0.776   | 0.60   | 1.98  |
| Rarely                                                                       | 1.52        | 0.173   | 0.83   | 2.79  |
| Doesn't visit                                                                | 0.98        | 0.955   | 0.48   | 2.01  |
| <b>Condom use in last sexual intercourse</b>                                 |             |         |        |       |
| No                                                                           | ref.        |         |        |       |
| Yes                                                                          | <b>0.48</b> | 0.001   | 0.31   | 0.75  |
| <b>Popper use before or during last sexual intercourse</b>                   |             |         |        |       |
| No                                                                           | ref.        |         |        |       |
| Yes                                                                          | 1.34        | 0.346   | 0.73   | 2.45  |
| <b>Alcohol use before or during last sexual intercourse</b>                  |             |         |        |       |
| No                                                                           | ref.        |         |        |       |
| Yes                                                                          | 1.29        | 0.237   | 0.85   | 1.95  |

Tab. 2a Adjusted Odds Ratios from a multivariable MIXED EFFECT logistic regression for self-reported previous STI (diagnosed positive) with age group as a random effect

| Previous STI                                                                 | Odds Ratio  | p-value | 95% CI |      |
|------------------------------------------------------------------------------|-------------|---------|--------|------|
| <b>FIXED EFFECT</b>                                                          |             |         |        |      |
| <b>Number of sexual male partners in the last 12 months</b>                  |             |         |        |      |
| 1                                                                            | ref.        |         |        |      |
| 2-4                                                                          | 0.73        | 0.302   | 0.40   | 1.33 |
| 5-12                                                                         | <b>1.67</b> | 0.086   | 0.93   | 3.01 |
| >12                                                                          | <b>2.68</b> | 0.001   | 1.47   | 4.89 |
| <b>Frequency of visiting gay clubs, bars, discos to meet sexual partners</b> |             |         |        |      |
| Many times                                                                   | ref.        |         |        |      |
| Sometimes                                                                    | 1.10        | 0.750   | 0.61   | 2.00 |
| Rarely                                                                       | 1.55        | 0.156   | 0.85   | 2.83 |
| Doesn't visit                                                                | 1.02        | 0.953   | 0.50   | 2.09 |
| <b>Condom use in last sexual intercourse</b>                                 |             |         |        |      |
| No                                                                           | ref.        |         |        |      |
| Yes                                                                          | <b>0.47</b> | 0.001   | 0.30   | 0.74 |
| <b>Popper use before or during last sexual intercourse</b>                   |             |         |        |      |
| No                                                                           | ref.        |         |        |      |
| Yes                                                                          | 1.34        | 0.343   | 0.73   | 2.44 |
| <b>Alcohol use before or during last sexual intercourse</b>                  |             |         |        |      |
| No                                                                           | ref.        |         |        |      |
| Yes                                                                          | 1.29        | 0.224   | 0.85   | 1.96 |
| <b>RANDOM EFFECT</b>                                                         |             |         |        |      |
| <b>AGE GROUP (var)</b>                                                       | <b>0.11</b> |         | 0.01   | 1.18 |

Tab. 3a Adjusted Odds Ratios from a multivariable MIXED EFFECT logistic regression for self-reported previous STI (diagnosed positive) with number of sexual male partners in the last 12 months as a random effect

| Previous STI                                                                 | Odds Ratio  | p-value | 95% CI |       |
|------------------------------------------------------------------------------|-------------|---------|--------|-------|
| <b>FIXED EFFECT</b>                                                          |             |         |        |       |
| <b>Age group</b>                                                             |             |         |        |       |
| 18-20                                                                        | ref.        |         |        |       |
| 21-30                                                                        | 1.56        | 0.303   | 0.67   | 3.64  |
| 31-40                                                                        | <b>2.65</b> | 0.024   | 1.13   | 6.22  |
| 41-50                                                                        | <b>3.04</b> | 0.020   | 1.20   | 7.75  |
| >50                                                                          | <b>4.76</b> | 0.006   | 1.57   | 14.45 |
| <b>Frequency of visiting gay clubs, bars, discos to meet sexual partners</b> |             |         |        |       |
| Many times                                                                   | ref.        |         |        |       |
| Sometimes                                                                    | 1.08        | 0.806   | 0.59   | 1.96  |
| Rarely                                                                       | 1.47        | 0.216   | 0.80   | 2.68  |
| Doesn't visit                                                                | 0.91        | 0.794   | 0.44   | 1.86  |
| <b>Condom use in last sexual intercourse</b>                                 |             |         |        |       |
| No                                                                           | ref.        |         |        |       |
| Yes                                                                          | <b>0.50</b> | 0.002   | 0.32   | 0.78  |
| <b>Popper use before or during last sexual intercourse</b>                   |             |         |        |       |
| No                                                                           | ref.        |         |        |       |
| Yes                                                                          | 1.40        | 0.270   | 0.77   | 2.57  |
| <b>Alcohol use before or during last sexual intercourse</b>                  |             |         |        |       |
| No                                                                           | ref.        |         |        |       |
| Yes                                                                          | 1.30        | 0.219   | 0.86   | 1.97  |
| <b>RANDOM EFFECT</b>                                                         |             |         |        |       |
| <b>Number of sexual male partners in the last 12 months (var)</b>            | <b>0.19</b> |         | 0.03   | 1.04  |

Tab. 4a Adjusted Odds Ratios from a multivariable MIXED EFFECT logistic regression for self-reported previous STI (diagnosed positive) with condom use in last sexual intercourse as a random effect

| Previous STI                                                                 | Odds Ratio  | p-value | 95% CI |       |
|------------------------------------------------------------------------------|-------------|---------|--------|-------|
| <b>FIXED EFFECT</b>                                                          |             |         |        |       |
| <b>Age group</b>                                                             |             |         |        |       |
| 18-20                                                                        | ref.        |         |        |       |
| 21-30                                                                        | 1.54        | 0.317   | 0.66   | 3.60  |
| 31-40                                                                        | <b>2.59</b> | 0.029   | 1.11   | 6.06  |
| 41-50                                                                        | <b>2.96</b> | 0.023   | 1.16   | 7.54  |
| >50                                                                          | <b>4.78</b> | 0.006   | 1.57   | 14.52 |
| <b>Number of sexual male partners in the last 12 months</b>                  |             |         |        |       |
| 1                                                                            | ref.        |         |        |       |
| 2-4                                                                          | 0.69        | 0.233   | 0.38   | 1.27  |
| 5-12                                                                         | 1.56        | 0.139   | 0.86   | 2.83  |
| >12                                                                          | <b>2.43</b> | 0.004   | 1.32   | 4.44  |
| <b>Frequency of visiting gay clubs, bars, discos to meet sexual partners</b> |             |         |        |       |
| Many times                                                                   | 1.10        | 0.757   | 0.61   | 2.00  |
| Sometimes                                                                    | 1.54        | 0.165   | 0.84   | 2.81  |
| Rarely                                                                       | 0.99        | 0.970   | 0.48   | 2.02  |
| Doesn't visit                                                                |             |         |        |       |
| <b>Popper use before or during last sexual intercourse</b>                   |             |         |        |       |
| No                                                                           | ref.        |         |        |       |
| Yes                                                                          | 1.35        | 0.331   | 0.74   | 2.46  |
| <b>Alcohol use before or during last sexual intercourse</b>                  |             |         |        |       |
| No                                                                           | ref.        |         |        |       |
| Yes                                                                          | 1.28        | 0.250   | 0.84   | 1.94  |
| <b>RANDOM EFFECT</b>                                                         |             |         |        |       |
| <b>Condom use in last sexual intercourse (var)</b>                           | <b>0.10</b> |         | 0.01   | 1.21  |
